# Supplementary material for: Implementation and performance of adaptive mesh refinement in the Ice Sheet System Model (ISSM v4.14)
Source: Copernicus journal article supplement (doi:10.5194/gmd-12-215-2019), 2019-01-14
Supplement: Supplementary file [file gmd-12-215-2019-supplement-title-page.pdf › gmd-12-215-2019-supplement-title-page.pdf]

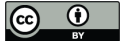

## *Supplement of*

# **Implementation and performance of adaptive mesh refinement in the Ice Sheet System Model (ISSM v4.14)**

**Thiago Dias dos Santos et al.**

*Correspondence to:* Thiago Dias dos Santos ([santos.td@gmail.com](mailto:santos.td@gmail.com))

- [gmd-12-215-2019-supplement-title-page.pdf](#)
- [new\\_bamg\\_MISMIPplus\\_L2\\_R30.avi](#)
- [new\\_bamg\\_MISMIPplus\\_L2\\_R5.avi](#)
- [new\\_neopz\\_MISMIPplus\\_L2\\_R5.avi](#)
- [new\\_neopz\\_MISMIPplus\\_L2\\_ZZ.avi](#)

The copyright of individual parts of the supplement might differ from the CC BY 4.0 License.
